# Supplementary material for: SIRIUS: decomposing isotope patterns for metabolite identification
Source: PubMed Central journal article supplement — Bioinformatics. 2008 Nov 17;25(2):218–24. doi: 10.1093/bioinformatics/btn603 (PMC2639009; doi:10.1093/bioinformatics/btn603), 2008-11-17
Supplement: btn603_1.pdf [file btn603_1.pdf]

## **SIRIUS: Decomposing isotope patterns for metabolite identification - Supplement**

Sebastian Böcker<sup>1</sup>, Matthias C. Letzel<sup>2</sup>, Zsuzsanna Lipták<sup>3</sup> and Anton Pervukhin<sup>1</sup>

<sup>1</sup>Lehrstuhl für Bioinformatik, Friedrich-Schiller-Universität Jena, 07743 Jena, Germany

<sup>2</sup>Organische Chemie I, Fakultät für Chemie, Universität Bielefeld, 33501 Bielefeld, Germany

<sup>3</sup>AG Genominformatik, Technische Fakultät, Universität Bielefeld, 33501 Bielefeld, Germany

---

Glossary

|                   |                                                                                                                                                                                     |
|-------------------|-------------------------------------------------------------------------------------------------------------------------------------------------------------------------------------|
| $M_0, \dots, M_K$ | mass list of input spectrum, with $M_0$ the monoisotopic peak                                                                                                                       |
| $f_0, \dots, f_K$ | normalized intensities of input spectrum, $\sum_i f_i = 1$                                                                                                                          |
| $X_E$             | random variable representing the mass distribution of element $E$                                                                                                                   |
| $Y_E$             | random variable representing the mass number distribution of element $E$                                                                                                            |
| $M$               | mass of molecule                                                                                                                                                                    |
| $N$               | nominal mass of molecule                                                                                                                                                            |
| $X$               | random variable representing the molecule's mass distribution, $X = X_1 + \dots + X_l$                                                                                              |
| $Y$               | random variable representing the molecule's nominal mass distribution, $Y = Y_1 + \dots + Y_l$                                                                                      |
| $m_k$             | mean peak mass of $+k$ peak, $m_k = \mathbb{E}(X \mid Y = N + k)$                                                                                                                   |
| $\varepsilon$     | measurement inaccuracy                                                                                                                                                              |
| $l, u$            | lower and upper bounds for computing real-valued decompositions, $l = M_0 - \varepsilon, u = M_0 + \varepsilon$                                                                     |
| $a_1, \dots, a_n$ | element masses                                                                                                                                                                      |
| $b$               | blowup factor (corresponds to precision $1/b$ )                                                                                                                                     |
| $\Delta$          | maximum rounding error, $\Delta = \Delta(b) = \max\{\Delta_j \mid j = 1, \dots, n\}$ , where $\Delta_j$ is the relative rounding error of element mass $a_j$ with blowup factor $b$ |

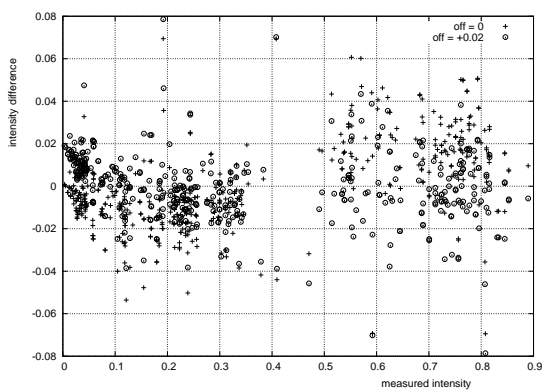

(a) FT-ICR, 3 ppm

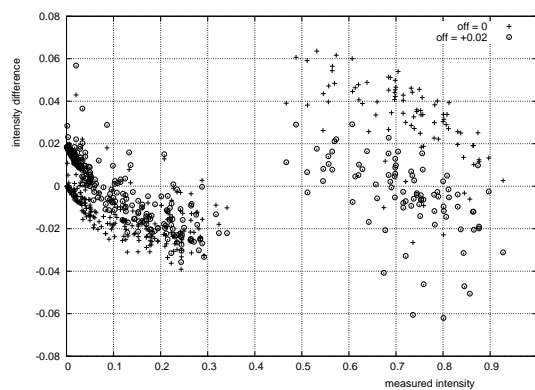

(b) oa-TOF, 5 ppm

**Figure 1.** Differences between measured and predicted peak intensities for the two datasets and mass accuracies in comparison: measured intensities computed without correction (crosses), measured intensities computed with correction  $off = +0.02$  (circles). Difference is calculated as measured *minus* predicted peak intensity.

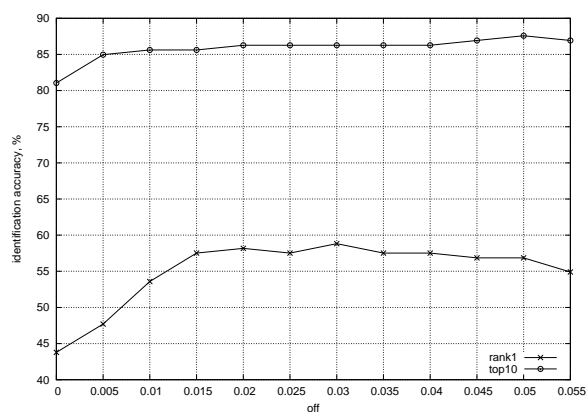

(a) FT-ICR, 3 ppm

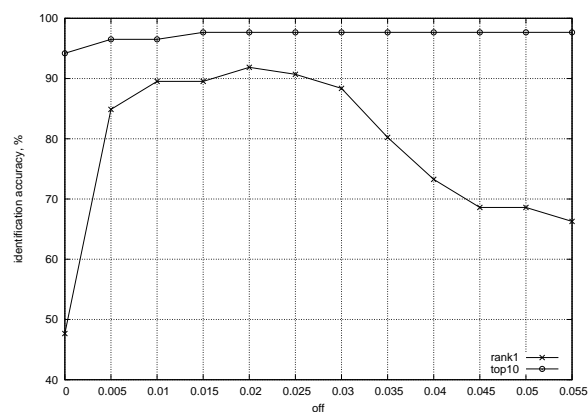

(b) oa-TOF, 5 ppm

**Figure 2.** Identification rates for various parameters  $off$ , for the two datasets in comparison: Percentage of correct identifications (crosses), Percentage of true sum formulas found in TOP 10 explanations (circles). We set mass and intensity precisions to fixed values:  $\alpha_1 = 3$ ,  $\alpha_0 = 6$ ,  $\beta_1 = 10$ ,  $\beta_0 = 90$  for the FT-ICR dataset, and  $\alpha_1 = 5$ ,  $\alpha_0 = 6.5$ ,  $\beta_1 = 10$ ,  $\beta_0 = 90$  for the oa-TOF dataset.

**Table 1.** Identification rates for various intensity precisions  $\beta_1$  (at full intensity) and  $\beta_0$  (at minimal intensity), for the FT-ICR dataset (left) and the oa-TOF dataset (right). We set mass accuracies  $\alpha_1$  (at full intensity) and  $\alpha_0$  (at minimal intensity) to fixed values:  $\alpha_1 = 3$ ,  $\alpha_0 = 6$  for the FT-ICR dataset, and  $\alpha_1 = 5$ ,  $\alpha_0 = 6.5$  for the oa-TOF dataset. Parameter  $off$  is set to  $+0.02$ . One can see that our method is very robust to small variations of the parameters.

| $\beta_1$ | $\beta_0$ | identification rate |           | $\beta_1$ | $\beta_0$ | identification rate |           |
|-----------|-----------|---------------------|-----------|-----------|-----------|---------------------|-----------|
|           |           | rank1 (%)           | top10 (%) |           |           | rank1 (%)           | top10 (%) |
| 5         | 70        | 58.82               | 86.93     | 5         | 90        | 91.86               | 97.67     |
| 15        | 70        | 58.82               | 86.93     | 5         | 100       | 91.86               | 97.67     |
| 5         | 80        | 58.82               | 85.62     | 10        | 90        | 91.86               | 97.67     |
| 10        | 70        | 58.17               | 86.93     | 10        | 100       | 91.86               | 97.67     |
| 10        | 90        | 58.17               | 86.27     | 15        | 90        | 91.86               | 97.67     |
| 15        | 90        | 58.17               | 86.27     | 15        | 100       | 91.86               | 97.67     |
| 20        | 70        | 58.17               | 85.62     | 20        | 90        | 91.86               | 97.67     |
| 5         | 90        | 57.52               | 86.27     | 20        | 100       | 91.86               | 97.67     |
| 5         | 100       | 57.52               | 86.27     | 5         | 80        | 90.70               | 97.67     |
| 10        | 100       | 57.52               | 86.27     | 5         | 110       | 90.70               | 97.67     |
| 15        | 80        | 57.52               | 86.27     | 10        | 80        | 90.70               | 97.67     |
| 20        | 80        | 57.52               | 86.27     | 10        | 110       | 90.70               | 97.67     |
| 20        | 90        | 57.52               | 86.27     | 15        | 80        | 90.70               | 97.67     |
| 5         | 110       | 57.52               | 85.62     | 15        | 110       | 90.70               | 97.67     |
| 10        | 80        | 57.52               | 85.62     | 20        | 80        | 90.70               | 97.67     |
| 20        | 110       | 57.52               | 85.62     | 20        | 110       | 90.70               | 97.67     |
| 10        | 110       | 56.86               | 85.62     | 5         | 70        | 89.53               | 97.67     |
| 15        | 100       | 56.86               | 85.62     | 10        | 70        | 89.53               | 97.67     |
| 15        | 110       | 56.86               | 85.62     | 15        | 70        | 89.53               | 97.67     |
| 20        | 100       | 56.86               | 85.62     | 20        | 70        | 89.53               | 97.67     |
